# Supplementary material for: Factor-Dependent Internal Ribosome Entry Site and -1 Programmed Frameshifting Signal in the Bemisia-Associated Dicistrovirus 2
Source: MDPI journal article supplement (doi:10.3390/v16050695), 2024-04-28

## SUPPLEMENTAL FIGURE LEGEND

**Figure S1: Predicted secondary model of BaDV-2 IGR IRES.** A) Specific nucleotides were mutated to validate the predicted secondary structure of BaDV-2 IGR IRES. B) The luciferase activities were measured through luciferase assays for each mutation via bicistronic reporter RNA assays in Sf-21 extracts. A one-way ANOVA statistical test was used to determine the p value and thus the significance levels. Groups were normalized to bicistronic RNAs containing WT BaDV-2. \* $p < 0.05$ , \*\* $p < 0.01$ . “n.s” denotes the difference is not significant between the experimental groups and WT ( $p > 0.05$ ). Shown are the averages from at least three independent experiments  $\pm$  standard deviation.

**Figure S2: BaDV-2 IGR IRES activity in mock-infected and CrPV-infected cells.** Bicistronic reporters were transfected into S2 cells followed by mock infection or CrPV infection (MOI = 20). Cells were collected 6 hours post transfection. Bicistronic RNAs tested contain the wild-type CrPV, mutant CrPV (CC6214-5 to GG to disrupt PKI basepairing), wild-type BaDV-2 full-length IGR IRES (WT BaDV-2), BaDV-2 3' DEL 5 and BaDV “minimal” IRES (double deletion at both 3' and 5' end. A) Renilla luciferase activities and B) ratio of Renilla/Firefly luciferase activities were measured and normalized to wild-type CrPV with mock infection. A paired t-test was used to determine the p value and thus the significance levels. \* represents  $p < 0.05$ , \*\* represents  $p < 0.01$ . “n.s” denotes the difference is not significant between the control groups and the experimental groups ( $p > 0.05$ ). Shown are the averages from at least three independent experiments  $\pm$  standard deviation.

**Figure S3: SHAPE reactivity of BaDV-2 IRES.** In vitro transcribed RNA was analyzed for SHAPE reactivity. Denatured vs folded RNA in the presence or absence of NMIA were analyzed by amplicon next-gen sequencing (UBC Sequencing and Bioinformatics Consortium). Relative

SHAPE reactivities for each nucleotide are depicted with colors indicated to the bottom right and are from three independent experiments.

A

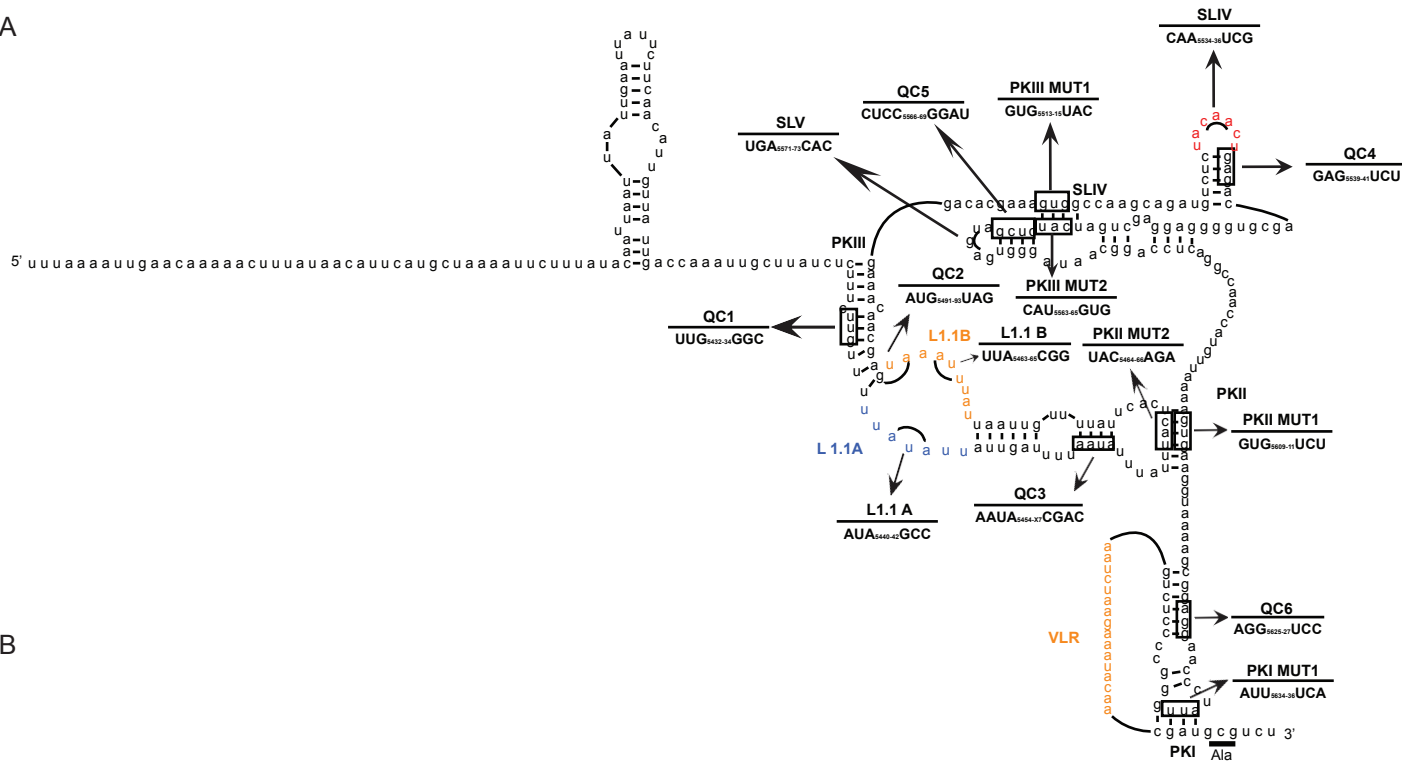

B

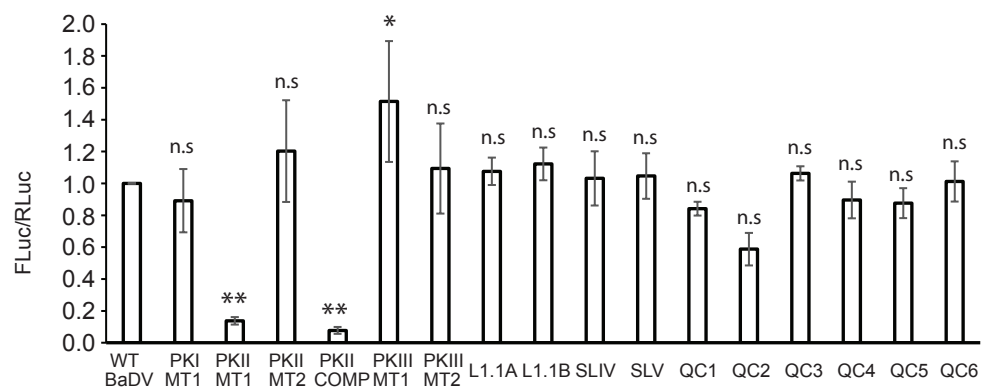

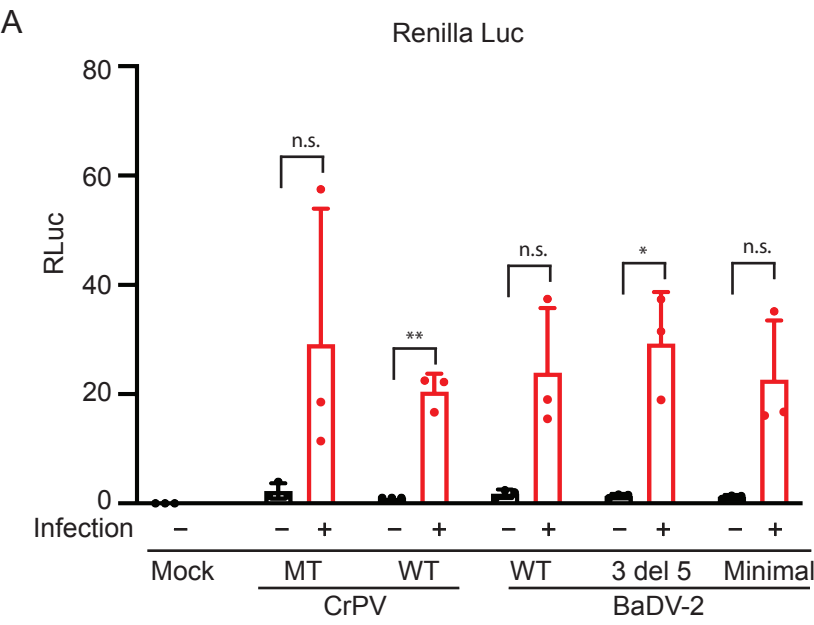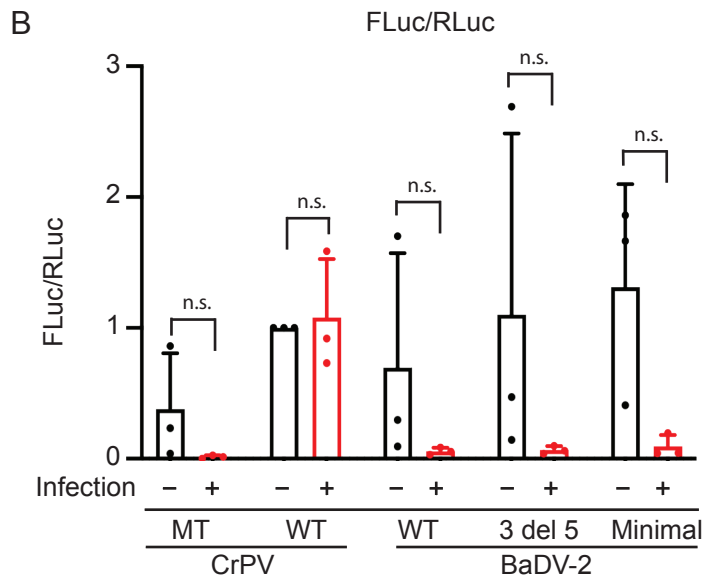

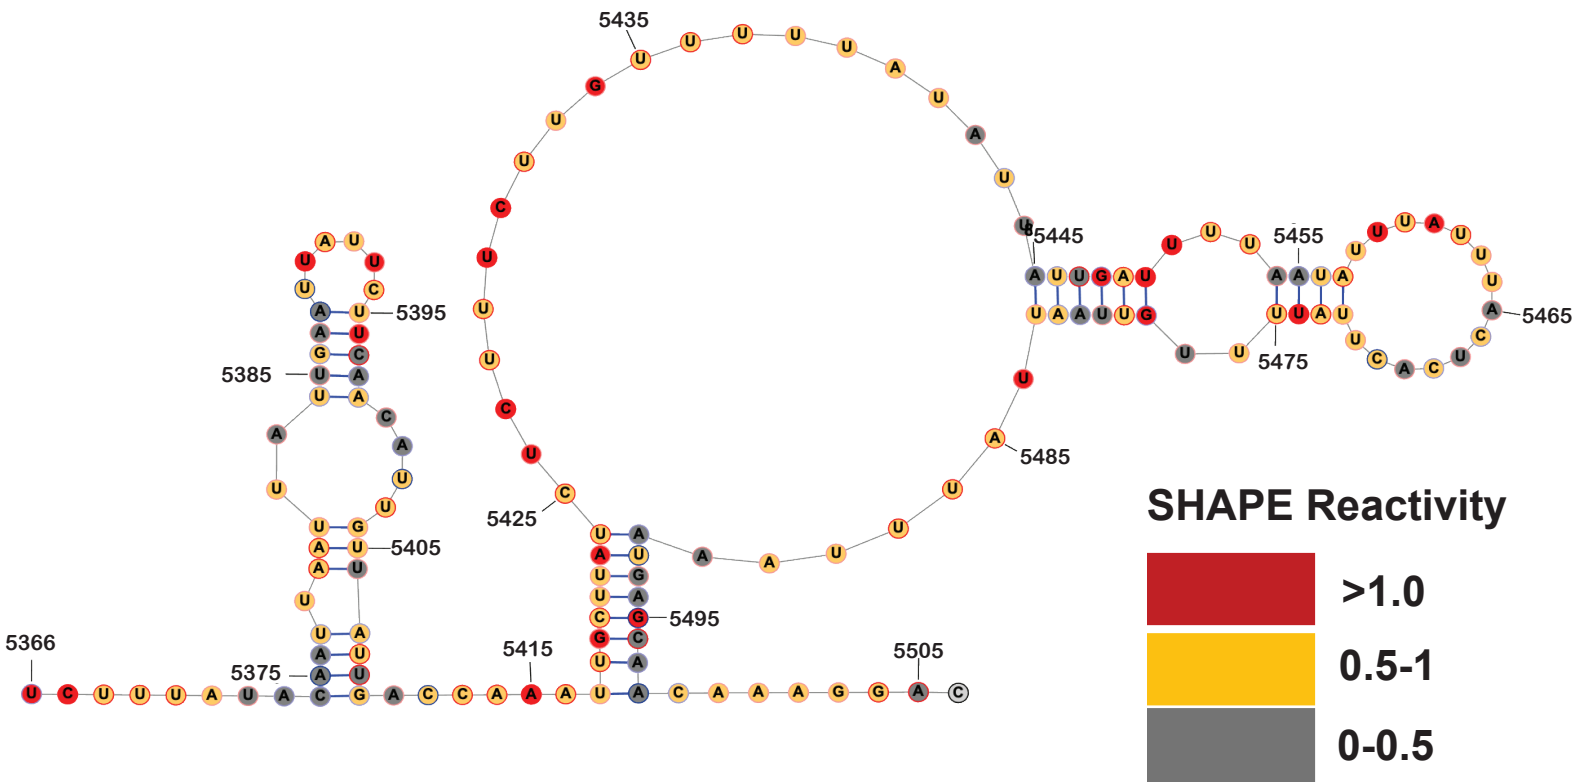

Supplement: s1 [file s1]
